# Supplementary material for: MErSiM v1.0: Resolving Biases in Global Silicate Weathering Model with A Data-Driven Surface Erosion Module
Source: Copernicus journal article supplement (doi:10.5194/egusphere-2025-5624), 2026-01-26
Supplement: Supplementary file [file egusphere-2025-5624-AC2-supplement.pdf]

# Response to reviewers' comments

## Response to Reviewer #2:

[Comment 1] Zhao and co-authors develop a new data-driven model of erosion and weathering and compare this model to similar output presented in Park et al. (2020), which uses a stream-power model coupled to Gabet and Mudd (2009; GM09). They find that their new model does a better job capturing global erosion rates, lowers estimated silicate weathering fluxes, and makes silicate weathering much less sensitive to changes in climate.

I found this an interesting paper to read and the figures are well-done. I especially appreciated the explanations of how the model achieved certain results, and the random-forest technique is especially well-suited to understand the controls on erosion. I also liked the sensitivity test of weathering to changes in CO<sub>2</sub>, since this is an important parameter in Earth system science that is poorly constrained. However, I have a number of concerns that should be addressed, so that readers understand the foundation on which this model was built.

Response: We sincerely thank Dr. Rugenstein for his constructive and encouraging assessment of our work. We are gratified by his positive evaluation of our data-driven modeling approach and the clarity of our figures and explanations. We have carefully considered and addressed each of the concerns raised to strengthen the foundation and clarity of the MErSiM framework, as detailed in our point-by-point responses below.

[Comment 2] First, the paper refers repeatedly to the “original GM09” model as including a stream-power component. GM09 does not include anything remotely related to stream-power and is perhaps better described as a reactive-transport-inspired model that attempts to predict weathering on hillslopes. I don't know which version of GEOCLIM included a stream-power model piggy-backed on to GM09 (perhaps an earlier paper by Pierre Maffre? (Maffre et al., 2018)), but this is used in Park et al. (2020), though I would definitely not characterize this as the original GM09 model.

Response: We sincerely thank the reviewer for this important correction and clarification. We agree that the original Gabet and Mudd (2009) (GM09) model is a reactive-transport-inspired framework specifically designed to predict regolith production and weathering on hillslopes, and it does not include a stream-power erosion component.

In our manuscript, we used "original GM09" as a shorthand to refer to the specific global modeling configuration implemented by Park et al. (2020), which coupled the GM09 weathering physics with a Stream Power Incision Model (SPIM) to represent the erosion driver. We recognize that this terminology is imprecise and potentially misleading to readers familiar with the original GM09 study.

36 To resolve this, we have revised the manuscript to distinguish between the core weathering  
37 physics (GM09) and the erosion driver (SPIM). We have added a paragraph to the Introduction  
38 section describing the combination of GM09 and SPIM in GEOCLIM models: “The GM09  
39 model has thus become a popular tool, notably being integrated into larger Earth System Models  
40 like GEOCLIM to explore long-term climate-tectonic interactions, where the erosion rate is  
41 provided by a Stream Power Incision Model (SPIM) (Maffre et al., 2018; Park et al., 2020). We  
42 refer to this combined configuration as GM09-SPIM.”

43 We have also replaced all subsequent references to “original GM09” with the more accurate term  
44 “GM09-SPIM” throughout the text.

45

46 [Comment 3] Second, the authors confuse the meaning of chemostatis (Godsey et al., 2009).  
47 Chemostasis refers to constant concentrations as runoff changes. This, in turn, means the silicate  
48 weathering fluxes scale linearly with runoff. I believe the authors mean some sort of kinetic-  
49 limit, such that, as runoff increases, concentrations decline, and silicate weathering fluxes are—  
50 as a consequence—flat.

51 Response: We sincerely thank the reviewer for this crucial clarification regarding the term  
52 "chemostasis." We agree with the reviewer’s definition based on Godsey et al. (2009, 2019):  
53 chemostasis implies that solute concentrations remain nearly constant as runoff changes.

54 The reviewer is correct in intuiting our intended meaning. In the original manuscript, we used  
55 "chemostatic" to describe a state where the weathering flux reaches a plateau and becomes  
56 insensitive to further increases in runoff. As the reviewer suggested, this is indeed a  
57 manifestation of a kinetic limit or regime. Our model results, consistent with the framework of  
58 Maher and Chamberlain (2014), indicate that under high-runoff conditions, the system is pushed  
59 toward this kinetic boundary because fluid travel times become too short for reactive  
60 equilibration.

61 We recognize that our previous terminology was imprecise and have revised the manuscript to  
62 replace "chemostatic" with "kinetically limited" throughout the text.

63

64 [Comment 4] More critically, the authors motivate much of the paper by arguing that Park et al.  
65 (2020) overestimate the silicate weathering flux. Maybe they do, maybe they don’t, but the  
66 model presented herein (MErSiM) produces a very low silicate weathering flux. It may match  
67 data from Müller et al. (2022), but the uncertainty on the volcanic flux is enormous (over an  
68 order of magnitude) (Coogan and Rugenstein, 2025) (see their Figure 13). To the extent that  
69 basically the silicate weathering flux must match the volcanic flux, I don’t think optimizing a  
70 model to the low-end of this estimate is particularly useful. What would happen if the model was  
71 optimized for a higher-end estimate? A higher-end estimate is, anyway, what Moon et al. (2014)  
72 estimate; the authors state that their model matches Moon’s estimates, though Moon estimates a  
73 global silicate weathering carbon flux nearly an order of magnitude higher than MErSiM. Either

74 way, the authors need to address what would happen if the model was optimized to a different  
75 global silicate weathering flux.

76 Response: We thank the reviewer for the challenging comment regarding the global flux  
77 magnitude. We particularly appreciate the opportunity to clarify the geochemical benchmarks  
78 used in our study.

79 We have carefully re-examined the results in Moon et al. (2014) and believe there may be a  
80 misunderstanding regarding the specific flux metrics reported. Moon et al. (2014) as well as  
81 Gaillardet et al. (1999) distinguished between the Ca+Mg silicate weathering flux and the total  
82 CO<sub>2</sub> consumption rate. In Moon et al. (2014), the global SWR<sub>Ca+Mg</sub>—which is the appropriate  
83 benchmark for long-term alkalinity and carbon balance models like ours—is estimated at  $2.17 \times$   
84  $10^{12}$  mol/yr ( $2\sigma$  range:  $1.59\text{--}2.75 \times 10^{12}$  mol/yr). Our model's target  $2.5 \times 10^{12}$  mol/yr is from the  
85 estimation of Gaillardet et al. (1999) and is aligned with this "Ca+Mg" benchmark SWR<sub>Ca+Mg</sub>.

86 The higher figure mentioned by the reviewer ( $\sim 11 \times 10^{12}$  mol/yr) likely refers to Moon et al.'s  
87 estimate of the total global CO<sub>2</sub> consumption rate, where  $7.85 \times 10^{12}$  mol/yr is from silicates  
88 (including SWR<sub>Ca+Mg</sub> and Na/K silicates), and  $4.08 \times 10^{12}$  mol/yr is from volcanic provinces  
89 estimated by Dessert et al. (2003).

90 In the context of long-term carbon cycle modeling (such as the GEOCLIM/MERSiM framework),  
91 the Ca+Mg silicate weathering flux is the critical parameter because only the weathering of Ca  
92 and Mg silicates provides the alkalinity required for marine carbonate precipitation and long-  
93 term CO<sub>2</sub> sequestration. Weathering of Na and K silicates consumes CO<sub>2</sub> in the short term but  
94 does not lead to carbonate burial. Our model's predicted magnitude of  $3.11 \times 10^{12}$  mol/yr is,  
95 therefore, not a "low-end" estimate but is aligned with—and even slightly higher than—the  
96 specific Ca+Mg benchmark ( $2.17 \times 10^{12}$  mol/yr) reported by Moon et al. (2014).

97 Regardless of the chosen global target, the primary contribution of MERSiM is its improved  
98 spatial consistency. As shown in our sensitivity analysis (Fig. 9), the MERSiM framework  
99 achieves optimal spatial performance with high  $R^2 + R_{log}^2$  for 81 watersheds around the world.  
100 This emergent property suggests that previous models' overestimations were indeed a symptom  
101 of incorrect spatial erosion distribution, rather than just an adjustable global bias. We have  
102 revised Section 3.5.1 to explicitly clarify these geochemical definitions and ensure the  
103 comparison with Moon et al. (2014) is transparent.

104 We agree that the uncertainty in volcanic degassing remains high as demonstrated in (Coogan  
105 and Caves Rügenstein, 2025). We believe that further work is needed to estimate weathering  
106 fluxes that include Na, K, and volcanic provinces, and to compare these with new estimates of  
107 degassing fluxes.

108

109 [Comment 5] Relatedly, I don't follow the argument about why erosion is the particular  
110 parameter that is most underconstrained and therefore produces a wrong silicate weathering flux.  
111 Maybe I just don't understand the argument, but the fact that we don't even know what the

112 silicate weathering flux should be means it's difficult to assign to a specific parameter why a  
113 certain model doesn't match certain estimates of silicate weathering. I like the authors' approach  
114 to building a better erosion model; however, I don't see this statement as a particularly helpful  
115 motivation for building such a model.

116 Response: We thank the reviewer for this critical reflection on our model's motivation. We agree  
117 that there are too many possible causes for an off estimate of silicate weathering, erosion rate  
118 does not have to be the one. Our motivation was from the previous attempt (Zuo et al., 2024) to  
119 reduce the systematic bias in the tropical region in the GM09-SPIM model. In that paper, we  
120 exhausted ways of reducing the bias by using different climate forcings and fitting parameters  
121 but failed all of them, even when chemical kinetic parameter ( $k_d$ ) was tuned to their lower limits.  
122 The only way we could find was to substantially reduce the erosion rate within the tropical  
123 region, which motivated us to build a better erosion model in Zhao et al. (2026). However,  
124 before doing the test in the current work, we do not know whether such a data-driven erosion  
125 model would also improve the silicate weathering flux since we did not tune the model  
126 specifically to reduce the erosion rate within the tropical region; the difference in erosion rates  
127 between this data-driven model and the subjectively tuned model of Zuo et al. (2024) is large (as  
128 shown in Fig. 5e of this manuscript). The fact that the MErSiM produces better results than the  
129 GM09-SPIM model then confirms that improving the erosion model is critical to improving the  
130 silicate weathering model.

131 Regarding the reviewer's statement "the fact that we don't even know what the silicate  
132 weathering flux should be", we agree that the inherent uncertainties in weathering fluxes of  
133 Na+K silicate and volcanic provinces make the global CO<sub>2</sub> consumption difficult to estimate.  
134 Before any obviously improved estimate becomes available, we think it is advisable to choose to  
135 trust the results of Gaillardet et al. (1999) and Moon et al. (2014), who gave similar estimation  
136 for Ca+Mg silicate weathering flux, with a discrepancy of less than 12%.

137 Importantly, other than the global total, spatial pattern of weathering fluxes is also improved by  
138 MErSiM. Specifically, MErSiM reduced the Mean Absolute Error (MAE) across all 81 basins by  
139 approximately 35% compared to the original GM09-SPIM ( $1.77 \times 10^{10} \text{ mol yr}^{-1}$  compared to  
140  $2.72 \times 10^{10} \text{ mol yr}^{-1}$ ). Second, the number of basins exhibiting "large" positive errors  
141 ( $5 \times 10^{10} \text{ mol yr}^{-1}$ ) dropped from 10 in GM09-SPIM to 4 in MErSiM. Third, in the tropics  
142 (basins located between 23S-23N), where GM09-SPIM errors often exceeded  $7 \times$   
143  $10^{10} \text{ mol yr}^{-1}$ , MErSiM reduced the average basin-scale bias by 90% ( $0.41 \times 10^{10} \text{ mol yr}^{-1}$   
144 compared to  $4.12 \times 10^{10} \text{ mol yr}^{-1}$ ). Therefore, we are not simply adjusting a global scalar to  
145 match an uncertain target, but rather resolving a structural discrepancy in how mineral supply is  
146 distributed globally.

147

148 [Comment 6] A few other caveats on the erosion model would be valuable. For example, I  
149 presume that there is no glacial erosion processes, meaning that calculating an LGM erosion flux  
150 assumes that glaciers only negligibly modify erosion and weathering processes. This is, of  
151 course, a major controversy in the field, and the lack of such a glacial erosion process is a major  
152 caveat. Similarly, at high CO<sub>2</sub> levels, one robust expectation of a warming climate is a change in

153 the timing and intensity of storms, which is likely to modify erosion. Based upon the parameters  
154 in MErSiM, I don't think such a shift in precipitation timing/intensity and its effect on erosion is  
155 captured in MErSiM. Another caveat that should be mentioned.

156 Response: We sincerely thank the reviewer for identifying these two critical caveats. We agree  
157 that the absence of explicit glacial processes and high-frequency intense precipitation represents  
158 a significant boundary for our model's interpretations, especially for the LGM and 4×CO<sub>2</sub>  
159 scenarios.

160 The reviewer is correct that MErSiM is primarily trained on modern cosmogenic-nuclide derived  
161 erosion rates. Since these training basins are located in non-glaciated or minimally glaciated  
162 regions, the model likely represents an "ice-free" erosional response to climate. We acknowledge  
163 that the lack of glacial grinding—which can significantly increase reactive surface area and  
164 modulate weathering—is a major caveat for our LGM simulations. We have added a dedicated  
165 paragraph to Section 3.6 (Scope of Applicability and Model Limitations) to address this.

166 We also agree that MErSiM's use of monthly/annual climatic averages (e.g., MAT, PWET, and  
167 Runoff) does not resolve changes in the timing and intensity of individual storms. While runoff  
168 acts as a macro-scale proxy for water flux, it cannot capture the erosional pulses driven by  
169 "flashier" precipitation regimes expected in a warmer world. The problem is not only in the  
170 erosion model, but also in the climate models where the storms are difficult to be simulated due  
171 to the low spatial resolution. One well-known example is the simulation of tropical cyclones,  
172 which have strong influence on the precipitation in coastal regions but require horizontal  
173 resolution of at least 0.25°×0.25° (Chang et al., 2020), far higher than normally used (coarser  
174 than 2°×2°) for the deep paleoclimate (e.g., Goddérís et al., 2012; Li et al., 2022; Valdes et al.,  
175 2021). This limitation is now explicitly discussed as a caveat in the context of our Section 3.6.  
176 We believe these additions significantly improve the transparency and foundational  
177 understanding of the model's scope.

178

179 [Comment 7] I found the sensitivity experiment to be particularly interesting, and I appreciated  
180 the explanation of why the model responds the way it does. However, it should be noted that in,  
181 for example, the 4x CO<sub>2</sub> experiment, the rise in silicate weathering flux is best understand as the  
182 instantaneous transient adjustment to a change in climate. Given the need to maintain mass  
183 balance in the carbon cycle (Bernier and Caldeira, 1997; Caves et al., 2016; Zeebe and Caldeira,  
184 2008), the silicate weathering flux will ultimately have to rise by exactly the same amount as  
185 whatever input flux of CO<sub>2</sub> caused the increase in atmospheric CO<sub>2</sub>. This would presumably  
186 involve changes in erosion beyond what is predicted by MErSiM (or including other components  
187 of the Earth system, such as weathering on marine shelves (Trapp-Müller et al., 2025) or in  
188 seafloor basalts (Coogan and Gillis, 2018)). However, the authors state that MErSiM is best  
189 thought of as a long-term (and not short-term, transient) model. Some acknowledgement that this  
190 is still a barrier to be resolved would help to place these sensitivity experiments in context.

191 Response: We sincerely thank the reviewer for this insightful comment regarding the  
192 fundamental requirement of carbon cycle mass balance (Berner and Caldeira, 1997). We agree  
193 that in a long-term steady state, the global carbon sink must equal the CO<sub>2</sub> input.

194 In the revised manuscript, we clarify that our 4×CO<sub>2</sub> simulations using CMIP6 datasets are  
195 designed as sensitivity experiments rather than transient simulations to a new steady state. They  
196 represent an instantaneous response of the current terrestrial landscape to a prescribed climate  
197 forcing. The result reveals that the terrestrial Ca+Mg silicate weathering thermostat in MErSiM  
198 is less efficient under extreme greenhouse conditions than previously models. However, we  
199 acknowledge that components of the Earth system may provide more rapid transient feedbacks,  
200 including:

201 1) as shown by Li et al. (2016), basalt weathering exhibits a much stronger temperature  
202 dependence in natural settings compared to global averages. These reactive terrains (e.g.,  
203 volcanic islands and large igneous provinces) can deliver a rapid surge in weathering flux during  
204 the early stages of a greenhouse warming event, effectively acting as a high-frequency regulator  
205 before the more extensive continental surfaces reach equilibrium.

206 2) while long-term carbonate-silicate cycle models focus on Ca+Mg flux, the weathering of  
207 alkali silicates (Na+K) provides a significant transient CO<sub>2</sub> sink that responds rapidly to changes  
208 in runoff and temperature. This transient drawdown can be crucial in damping climate excursions  
209 on shorter timescales, even if it does not lead to permanent carbon burial.

210 3) as the reviewer correctly noted, other important sinks such as marine shelf weathering (Trapp-  
211 Müller et al., 2025) and seafloor basalt alteration (Coogan and Gillis, 2018) may also adjust to  
212 fulfill the mass balance requirement when the terrestrial continental sink approaches kinetic or  
213 supply limits.

214 We have revised the manuscript Section 3.5.2 to acknowledge that the weak sensitivity of the  
215 "continental thermostat" in MErSiM implies a greater reliance on these highly reactive  
216 lithologies and marine sinks to maintain global mass balance.

217

218 [Comment 8] Lastly, equation 10 (similar to West (2012)) demonstrates that erosion will be the  
219 predominant variable impacting the estimate silicate weathering flux (Equation 10 needs to be  
220 derived...it's not clear to me how the authors reach Equation 10 from the previous equations).  
221 This is in contrast to Maher and Chamberlain (2014) who parameterize silicate weathering as  
222 being predominantly impacted by runoff and the equilibrium concentration (equation 3 and  $F_{wsil}$   
223 =  $q \cdot C$ , where  $q$  is runoff and  $C$  is concentration). I bring this up to point out that I don't think  
224 this paper demonstrates that their formulation is indeed the best formulation to understand  
225 silicate weathering. It simply does a better job than a similar formulation that also places a heavy  
226 emphasis on erosion. One would need to do a similar analysis using Maher and Chamberlain  
227 (2014) (or another model) to demonstrate which model produces a better estimate of the silicate  
228 weathering flux. Even this is difficult, since our constraints on the weathering flux are poor.  
229 Thus, MErSiM ends up predicting that catchments are near the kinetic boundary and will be

230 sensitive to changes in erosion, but it's not clear to me that this is supported by the data,  
231 particularly if another model is used to interpret catchment solute data. Perhaps this is beyond the  
232 scope of this paper, but it is an overall caveat in how one conceptualizes the modeling presented  
233 herein.

234 Again, thanks for an interesting paper, and I hope these comments are helpful in revising the  
235 paper and addressing any outstanding questions.

236 Response: We thank the reviewer for pointing out that the derivation of Equation 10 was not  
237 sufficiently transparent. We have added a detailed derivation in the manuscript (also in the  
238 response below of [Comment 13]).

239 We appreciate the reviewer's insightful comparison with the framework of Maher and  
240 Chamberlain (2014). We agree that their model conceptualizes weathering through a different  
241 lens. The fundamental difference between two branches of models lies in the leading variable—  
242 whereas Maher and Chamberlain (2014) focus on the competition between fluid travel time and  
243 equilibrium time, MErSiM (rooted in GM09/West 2012) focuses on the competition between  
244 mineral supply (erosion) and reaction kinetics within a regolith column.

245 However, the two frameworks are not mutually exclusive. Maher and Chamberlain (2014) also  
246 acknowledge that the mineral supply rate affects the Damköhler coefficient and thus the  
247 sensitivity of the system.

248 The reviewer suggests that our prediction of catchments being near the "kinetic boundary"  
249 (where fluxes are sensitive to erosion) might be a consequence of our model's structure rather  
250 than the data itself. We emphasize that this conclusion is an emergent property of our objective  
251 global optimization. In our calibration across 81 major basins, the model was free to select  
252 parameters that could have placed these basins in a regime more indifferent to erosion rate, that  
253 is, a large enough base dissolution rate constant  $k_d$ . But when MErSiM achieved a spatial and  
254 global flux estimation more consistent with data, it used  $k_d = 1 \times 10^{-4}$ . Therefore, during this  
255 parameter calibration process, data "chose" a model more sensitive to erosion.

256 We accept the reviewer's point that we have not definitively proven MErSiM to be the "best"  
257 possible formulation for silicate weathering. Our study demonstrates that MErSiM is an  
258 advancement over previous erosion-driven frameworks (like Park et al. 2020) because it resolves  
259 longstanding spatial biases. We have tempered our language and added a paragraph to Section  
260 3.6 to acknowledge that different conceptual frameworks may lead to different interpretations of  
261 catchment data. We agree that a formal inter-model comparison using the same global datasets  
262 would be a valuable direction for future research.

263

264 [Comment 9] Line 18: What is the systematic tropical overestimation?

265 Response: By "systematic tropical overestimation," we refer to the phenomenon where GM09-  
266 SPIM predict weathering flux in tropical basins (e.g., the Amazon and Congo) that are  
267 significantly higher than observed values of Gaillardet et al. (1999).

268 [Comment 10] Line 48: I'm not sure the global degassing flux is that well-constrained. Müller et  
269 al. (2022) may claim it is, but recent compilations suggest nearly an order of magnitude  
270 uncertainty (Coogan and Rugenstein, 2025) (see their Figure 13 and references therein).

271 Reponse: We thank the reviewer for pointing out this recent and important work. We have added  
272 a citation to Coogan and Rugenstein (2025) and revised the text to acknowledge that the global  
273 degassing flux is subject to nearly an order of magnitude of uncertainty, rather than being strictly  
274 constrained by any single study.

275 [Comment 11] Line 67: I would not characterize GM09 as using a simplified stream power  
276 incision model. If anything, they use a sort of reactive-transport-inspired model that looks only at  
277 hillslopes.

278 Response: We have revised the manuscript to clarify that the original GM09 (Gabet and Mudd,  
279 2009) does not include a stream-power component.

280 [Comment 12] Equation 8: This equation is not in the original GM09 model. I believe it is a  
281 modification in GEOCLIM. In the original GM09 model, erosion is simply an independent  
282 variable.

283 Response: We have revised the manuscript to clarify that this equation is from GM09-SPIM  
284 framework.

285 [Comment 13] Equation 10: Please provide the derivation for this equation.

286 Response: Thanks. We have added detailed derivation for Equation 10 in the manuscript.

287 "While GM09 is a transient model, for long-term geological applications it is typically run to a  
288 steady-state solution where the regolith thickness, mineral concentration and exposure time are  
289 all constant ( $\frac{dh}{dt} = 0$ ,  $\frac{\partial x}{\partial t} = 0$ ,  $\frac{\partial \tau}{\partial t} = 0$ ). Under this assumption, the regolith production rate  
290 equals the erosion rate ( $P_r = E$ ) according to Eq. 1. The particle residence time at height  $z$  above  
291 the bedrock therefore simplifies to  $\tau = \frac{z}{E}$  according to Eq.3. Substituting these into the mineral  
292 mass balance (Eq. 2) yields  $K \left(\frac{z}{E}\right)^\sigma x = -E \left(\frac{\partial x}{\partial z}\right)$ . Integrating this rate throughout the entire  
293 regolith column ( $z = 0$  to  $z = h$ , Eq. 4) yields the total flux  $W = E(x|_{z=0} - x|_{z=h})$ , where  
294  $x|_{z=0}$  and  $x|_{z=h}$  are the mineral concentrations at the bedrock and surface, respectively. Vertical  
295 integration of  $K \left(\frac{z}{E}\right)^\sigma x = -E \left(\frac{\partial x}{\partial z}\right)$  gives  $\int_{x|_{z=0}}^{x|_{z=h}} \frac{1}{x} dx = -\frac{K}{E^{\sigma+1}} \int_0^h z^\sigma dz$ , from which we have  
296 the solution  $x|_{z=h} = x|_{z=0} e^{\frac{-K}{E^{\sigma+1}} \left(\frac{h}{E}\right)^{\sigma+1}}$ . Substituting the expression of  $K$  (Eq. 9), the weathering  
297 flux  $W$  simplifies to an expression:

298 
$$W = E \left( x|_{z=0} - x|_{z=0} e^{\frac{-k_d(1 - e^{-k_w q}) e^{\left[\left(\frac{E_d}{R}\right) \left(\frac{1}{T_0} - \frac{1}{T}\right)\right]} \left(\frac{h}{E}\right)^{\sigma+1}}}{\sigma+1}} \right) \quad (10)$$

299 ”

300 [Comment 14] Lines 185-9: Only 2 purposes are listed, rather than 3.

301 Response: Thanks. The manuscript has been corrected.

302 [Comment 15] Line 490: I wouldn't say that the peak of the yellow curve is strictly within the  
303 gray bar...it is still somewhat shifted to the right.

304 Response: The reviewer is correct that the peak of the yellow curve ( $R_{log}^2$ ) in Figure 9b sits at  
305  $\sim 3.5 \times 10^{12} \text{ mol yr}^{-1}$ , which is indeed outside the  $2.0 - 3.0 \times 10^{12} \text{ mol yr}^{-1}$  grey band.

306 We have revised the text to clarify that the peak of the joint metric ( $R^2 + R_{log}^2$ , blue curve) and  
307 the standard  $R^2$  (red curve) now fall within the observational range instead of all three metrics.

308 [Comment 16] Line 515: The Moon et al. (2014) estimate is substantially higher when  
309 considering all fluxes (ie,  $\sim 11 \times 10^{13}$  mols C/yr)

310 Response: We thank the reviewer for prompting us to clarify our comparison with the estimates  
311 in Moon et al. (2014). The reviewer correctly points out that Moon et al. (2014) report a higher  
312 flux when considering total CO2 consumption. However, the global Ca + Mg silicate weathering  
313 flux in that paper is  $2.17 \times 10^{12} \text{ mol/yr}$ . In long-term carbon cycle modeling (including MErSiM  
314 and the GEOCLIM framework), this Ca+Mg flux is the exact target metric, as it represents the  
315 alkalinity flux that ultimately leads to long-term carbon sequestration via marine carbonate  
316 precipitation (excluding Na and K weathering). Our target flux of  $\sim 2.5 \times 10^{12} \text{ mol C/yr}$  aligns  
317 with this specific metric.

318 The higher estimate mentioned by the reviewer corresponds to Moon et al.'s "global CO2  
319 consumption rates from silicates" when including volcanic provinces, which they report as  $11.93$   
320  $\times 10^{12} \text{ mol/yr}$  (we note that the " $11 \times 10^{13}$ " in the comment appears to be a minor typographical  
321 error in the exponent). Because MErSiM specifically simulates the long-term stabilizing carbon  
322 flux (Ca+Mg), it is geochemically consistent to benchmark against their  $2.17 \times 10^{12} \text{ mol/yr}$   
323 estimate.

324 To avoid any confusion for future readers, we have revised the manuscript to explicitly clarify  
325 that our benchmark corresponds specifically to the Ca+Mg silicate weathering flux reported by  
326 Moon et al. (2014), rather than the total CO2 consumption rate.

327 [Comment 17] Line 567: "Chemostatic" has the opposite meaning; that is, solute concentrations  
328 remain the same as runoff changes, which has been used to suggest that the catchment has  
329 reached reaction equilibrium. I think you mean to say, "kinetically limited".

330 Line 570: Again, I think you mean close to the kinetic boundary

331 Line 618: Again, wrong use of chemostatic

332 Response: We are very grateful to the reviewer for pointing out the incorrect use of the term  
333 "chemostasis." We agree that in the hydrological community (e.g., Godsey et al., 2009, 2019),  
334 chemostasis typically refers to a state where solute concentrations remain nearly constant despite  
335 changes in discharge.

336 In the original manuscript, we used "chemostatic" in the context of the Damköhler number  
337 framework (Maher and Chamberlain, 2014) to describe a state of weathering flux saturation. We  
338 acknowledge that this usage is ambiguous and contradicts the definition favored by the reviewer.

339 We have revised the text to replace "chemostatic" with "kinetically limited" and added a  
340 discussion on the coupling between the negative temperature-erosion response and the attenuated  
341 weathering feedback.

342

343 Reference:

344 Berner, R.A., Caldeira, K., 1997. The need for mass balance and feedback in the geochemical  
345 carbon cycle. *Geology* 25, 955–956. [https://doi.org/10.1130/0091-](https://doi.org/10.1130/0091-7613(1997)025%253C0955:TNFMBA%253E2.3.CO;2)  
346 [7613\(1997\)025%253C0955:TNFMBA%253E2.3.CO;2](https://doi.org/10.1130/0091-7613(1997)025%253C0955:TNFMBA%253E2.3.CO;2)

347 Chang, P., Zhang, S., Danabasoglu, G., Yeager, S.G., Fu, H., Wang, H., Castruccio, F.S., Chen,  
348 Y., Edwards, J., Fu, D., Jia, Y., Laurindo, L.C., Liu, X., Rosenbloom, N., Small, R.J., Xu,  
349 G., Zeng, Y., Zhang, Q., Bacmeister, J., Bailey, D.A., Duan, X., DuVivier, A.K., Li, D.,  
350 Li, Y., Neale, R., Stössel, A., Wang, L., Zhuang, Y., Baker, A., Bates, S., Dennis, J.,  
351 Diao, X., Gan, B., Gopal, A., Jia, D., Jing, Z., Ma, X., Saravanan, R., Strand, W.G., Tao,  
352 J., Yang, H., Wang, X., Wei, Z., Wu, L., 2020. An Unprecedented Set of High-  
353 Resolution Earth System Simulations for Understanding Multiscale Interactions in  
354 Climate Variability and Change. *J Adv Model Earth Syst* 12, e2020MS002298.  
355 <https://doi.org/10.1029/2020MS002298>

356 Coogan, L.A., Caves Rügenstein, J.K., 2025. Regulation of the carbon cycle on geological  
357 timescales, in: *Treatise on Geochemistry*. Elsevier, pp. 419–465.  
358 <https://doi.org/10.1016/B978-0-323-99762-1.00060-7>

359 Coogan, L.A., Gillis, K.M., 2018. Low-Temperature Alteration of the Seafloor: Impacts on  
360 Ocean Chemistry. *Annu. Rev. Earth Planet. Sci.* 46, 21–45.  
361 <https://doi.org/10.1146/annurev-earth-082517-010027>

362 Dessert, C., Dupré, B., Gaillardet, J., François, L.M., Allègre, C.J., 2003. Basalt weathering laws  
363 and the impact of basalt weathering on the global carbon cycle. *Chemical Geology,*  
364 *Controls on Chemical Weathering* 202, 257–273.  
365 <https://doi.org/10.1016/j.chemgeo.2002.10.001>

366 Gabet, E.J., Mudd, S.M., 2009. A theoretical model coupling chemical weathering rates with  
367 denudation rates. *Geology* 37, 151–154. <https://doi.org/10.1130/G25270A.1>

368 Gaillardet, J., Dupré, B., Louvat, P., Allègre, C.J., 1999. Global silicate weathering and CO<sub>2</sub>  
369 consumption rates deduced from the chemistry of large rivers. *Chemical Geology* 159, 3–  
370 30. [https://doi.org/10.1016/S0009-2541\(99\)00031-5](https://doi.org/10.1016/S0009-2541(99)00031-5)

371 Goddérés, Y., Donnadiou, Y., Lefebvre, V., Le Hir, G., Nardin, E., 2012. Tectonic control of  
372 continental weathering, atmospheric CO<sub>2</sub>, and climate over Phanerozoic times. *Comptes*  
373 *Rendus. Géoscience* 344, 652–662. <https://doi.org/10.1016/j.crte.2012.08.009>

374 Li, Gaojun, Hartmann, J., Derry, L.A., West, A.J., You, C.-F., Long, X., Zhan, T., Li, L., Li,  
375 Gen, Qiu, W., Li, T., Liu, L., Chen, Y., Ji, J., Zhao, L., Chen, J., 2016. Temperature  
376 dependence of basalt weathering. *Earth and Planetary Science Letters* 443, 59–69.  
377 <https://doi.org/10.1016/j.epsl.2016.03.015>

378 Li, X., Hu, Y., Guo, J., Lan, J., Lin, Q., Bao, X., Yuan, S., Wei, M., Li, Z., Man, K., Yin, Z.,  
379 Han, J., Zhang, J., Zhu, C., Zhao, Z., Liu, Y., Yang, J., Nie, J., 2022. A high-resolution  
380 climate simulation dataset for the past 540 million years. *Sci Data* 9, 371.  
381 <https://doi.org/10.1038/s41597-022-01490-4>

382 Maher, K., Chamberlain, C.P., 2014. Hydrologic Regulation of Chemical Weathering and the  
383 Geologic Carbon Cycle. *Science* 343, 1502–1504.  
384 <https://doi.org/10.1126/science.1250770>

385 Moon, S., Chamberlain, C.P., Hilley, G.E., 2014. New estimates of silicate weathering rates and  
386 their uncertainties in global rivers. *Geochimica et Cosmochimica Acta* 134, 257–274.  
387 <https://doi.org/10.1016/j.gca.2014.02.033>

388 Trapp-Müller, G., Caves Rugenstein, J., Conley, D.J., Geilert, S., Hagens, M., Hong, W.-L.,  
389 Jeandel, C., Longman, J., Mason, P.R.D., Middelburg, J.J., Milliken, K.L., Navarre-  
390 Sitchler, A., Planavsky, N.J., Reichart, G.-J., Slomp, C.P., Sluijs, A., Van Hinsbergen,  
391 D.J.J., Zhang, X.Y., 2025. Earth’s silicate weathering continuum. *Nat. Geosci.* 18, 691–  
392 701. <https://doi.org/10.1038/s41561-025-01743-y>

393 Valdes, P.J., Scotese, C.R., Lunt, D.J., 2021. Deep ocean temperatures through time. *Clim. Past*  
394 17, 1483–1506. <https://doi.org/10.5194/cp-17-1483-2021>

395 Zhao, J., Liu, Y., Li, G., Zuo, H., 2026. Thresholds in the controls of denudation rates: A global  
396 analysis of tectonic, climatic and biological factors based on machine learning. *Earth and*  
397 *Planetary Science Letters* 674, 119750. <https://doi.org/10.1016/j.epsl.2025.119750>

398 Zuo, H., Liu, Y., Li, G., Xu, Z., Zhao, L., Guo, Z., Hu, Y., 2024. A revised model of global  
399 silicate weathering considering the influence of vegetation cover on erosion rate. *Geosci.*  
400 *Model Dev.* 17, 3949–3974. <https://doi.org/10.5194/gmd-17-3949-2024>

401

402
